# Supplementary material for: Two birds with one stone: large catalytic areas and abundant nitrogen sites inspired by fluorine doping contributing to CO2RR activity and selectivity
Source: Royal Society of Chemistry journal article supplement (doi:10.1039/d2dt02864f), 2022-01-01
Supplement: d2dt02864f1.pdf [file d2dt02864f1.pdf]

## **Two Birds with One Stone: High Catalytic Areas and Abundant Nitrogen Sites Inspired by Fluorine doping contributing to CO<sub>2</sub>RR Activity and Selectivity**

Hongyu Chen,<sup>a,b</sup> Yi Zhang,<sup>b</sup> Tianfang Yang,<sup>c</sup> Yizhu Shang,<sup>b</sup> Qiuying Zhu,<sup>b</sup> Shoufu Cao,<sup>b</sup> Xiaojing Lin,<sup>b</sup> Siyuan Liu,<sup>b</sup> Shuxian Wei,<sup>a</sup> Baojun Wei,<sup>\*a</sup> Zhaojie Wang,<sup>\*b</sup> Xiaoqing Lu<sup>\*b</sup>

<sup>a</sup>College of Science, China University of Petroleum, No.66 Changjiang West road, Huangdao District, Qingdao, Shandong 266580, P. R. China

<sup>b</sup>School of Materials Science and Engineering, China University of Petroleum, No.66 Changjiang West road, Huangdao District, Qingdao, Shandong 266580, P. R. China

<sup>c</sup>College of Arts and Science, China University of Petroleum-Beijing at Karamay, No. 355 Anding Road, Karamay District, Karamay, Xinjiang 834000, P.R. China

Corresponding Author:

\*E-mail: weibj@upc.edu.cn, wangzhaojie@upc.edu.cn, luxq@upc.edu.cn

**Keywords:** Diverse heteroatoms, PVDF, Nitrogen fixator, CO<sub>2</sub> Electroreduction, CO

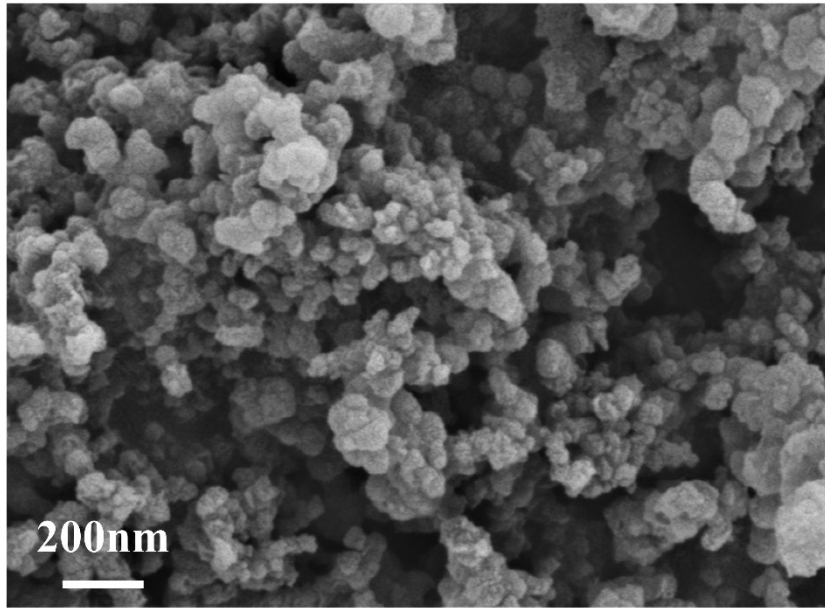

**Fig. S1.** SEM image of CB.

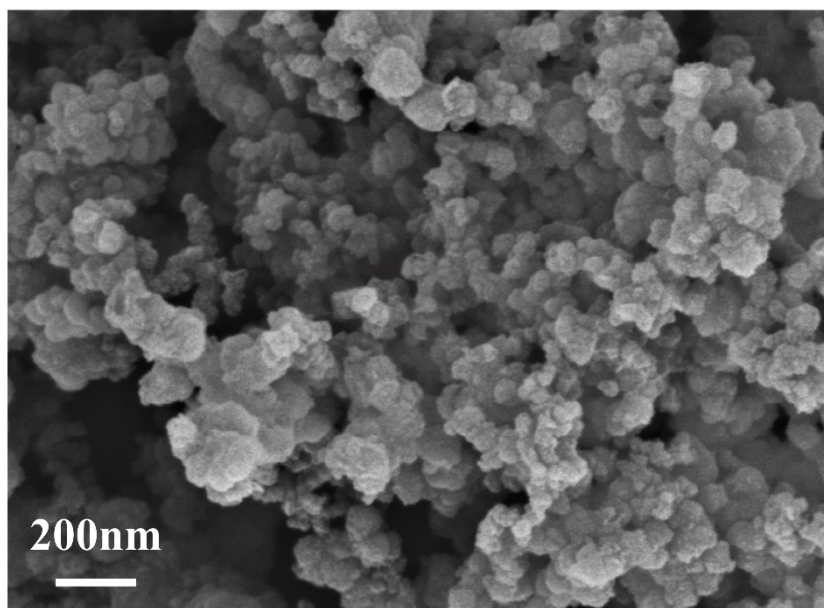

**Fig. S2.** SEM image of N-CB.

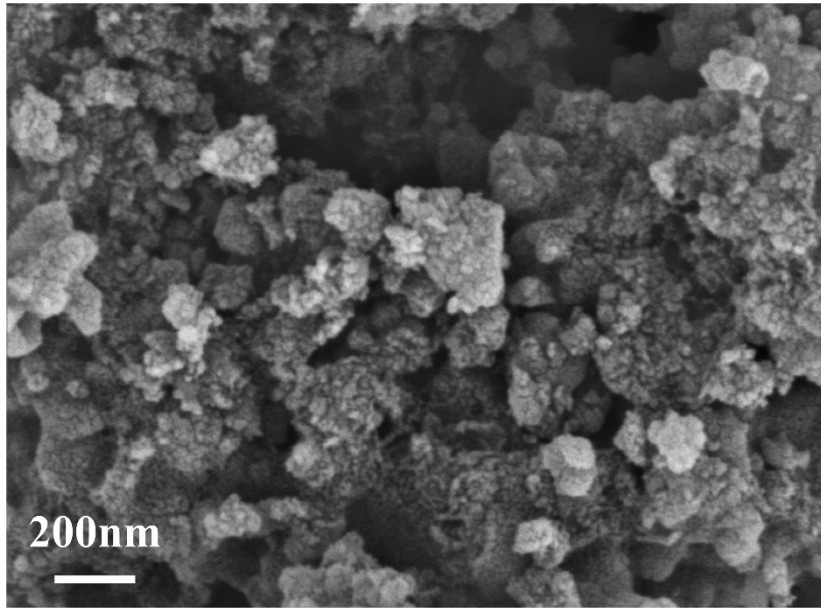

**Fig. S3.** SEM image of F-CB.

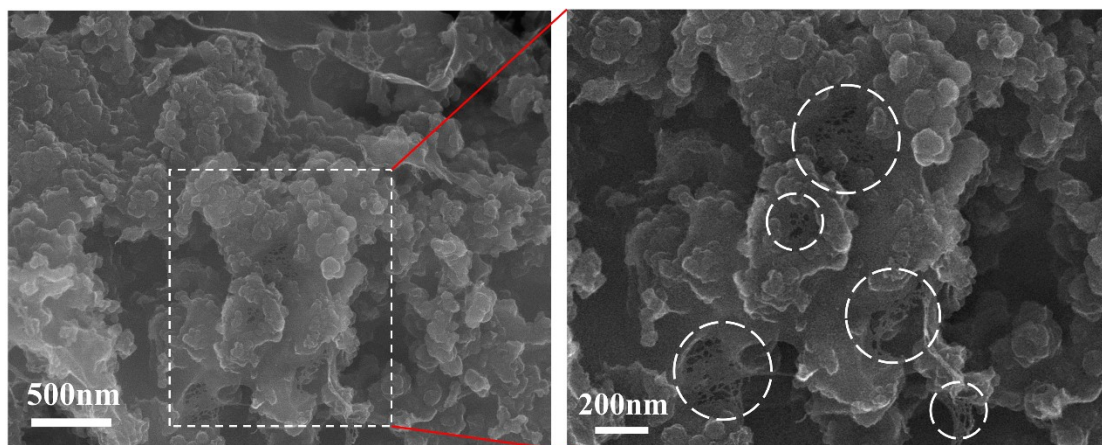

**Fig. S4.** SEM images of N,F-CB.

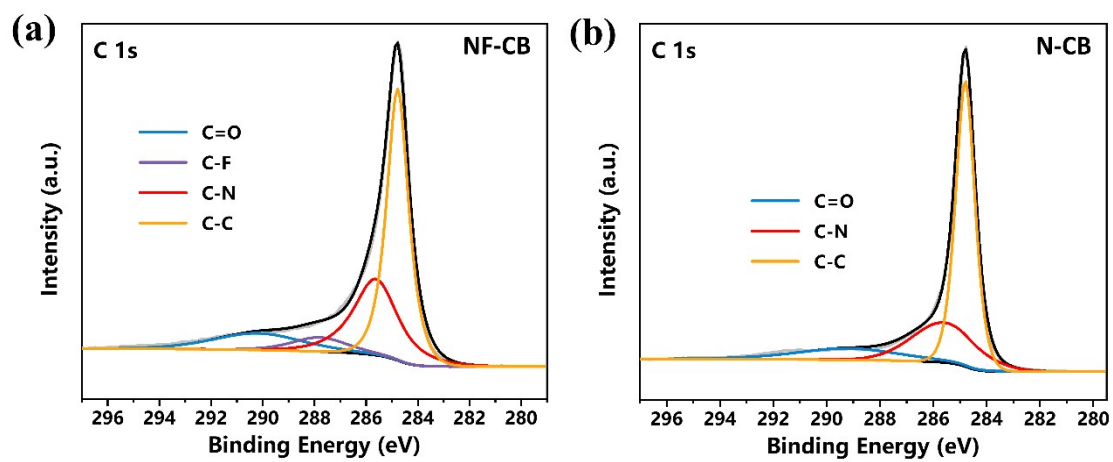

**Fig. S5.** High-resolution XPS spectra of C 1s of (a) N,F-CB and (b) N-CB.

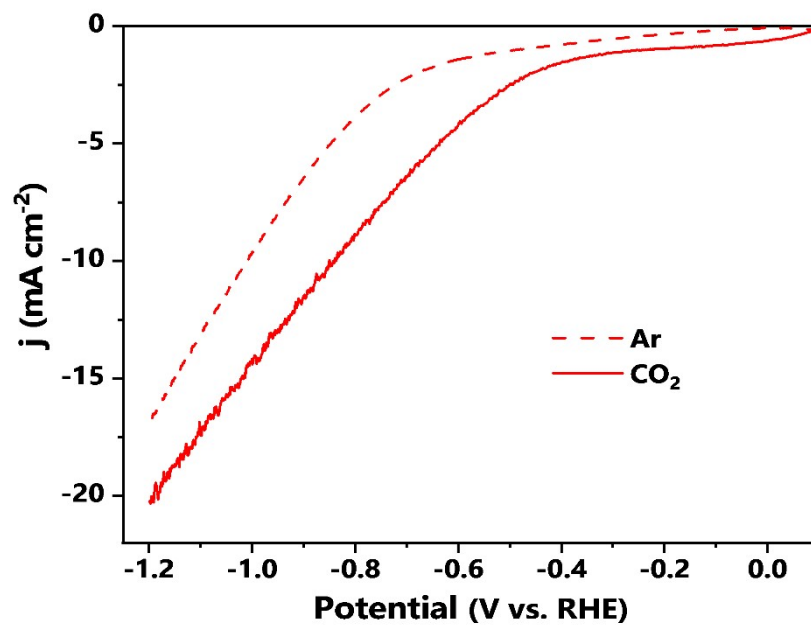

**Fig. S6.** LSV curves of N<sub>3</sub>F-CB in CO<sub>2</sub>- or Ar-saturated 0.1 M KHCO<sub>3</sub> solutions.

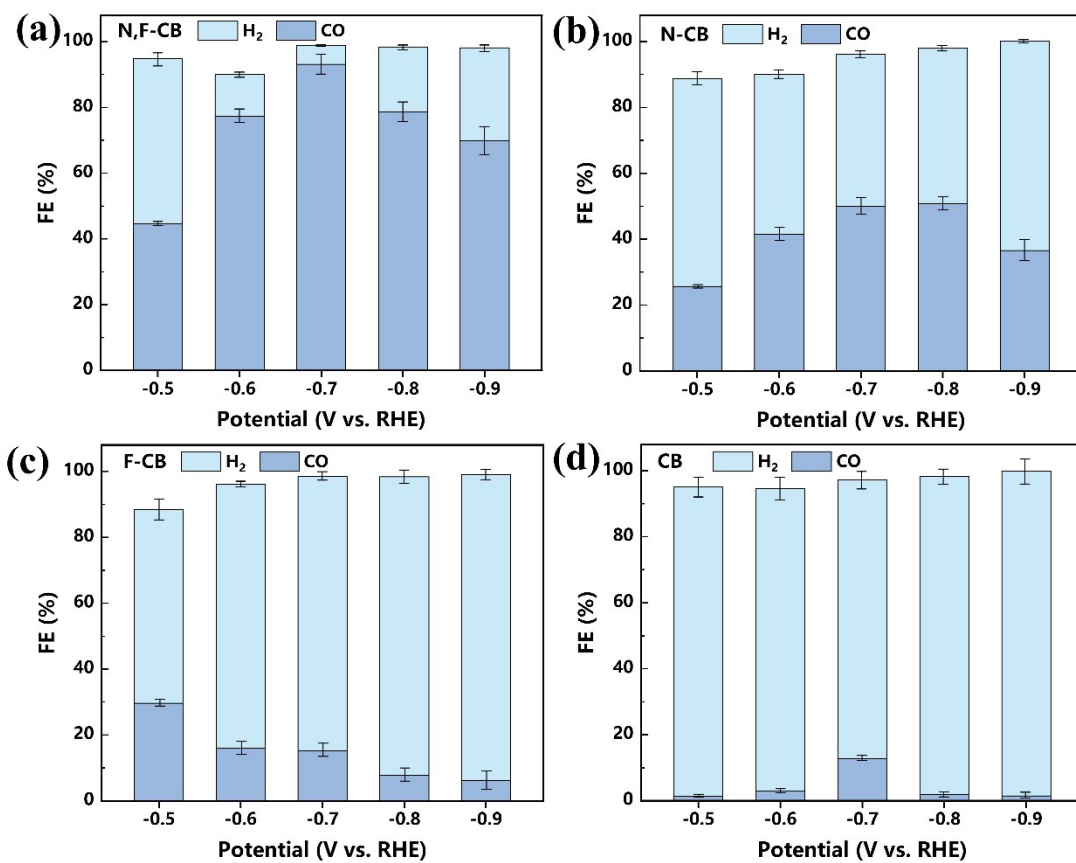

**Fig. S7.** Faradaic efficiencies of products for the (a) N,F-CB, (b) N-CB, (c) F-CB, (d) CB.



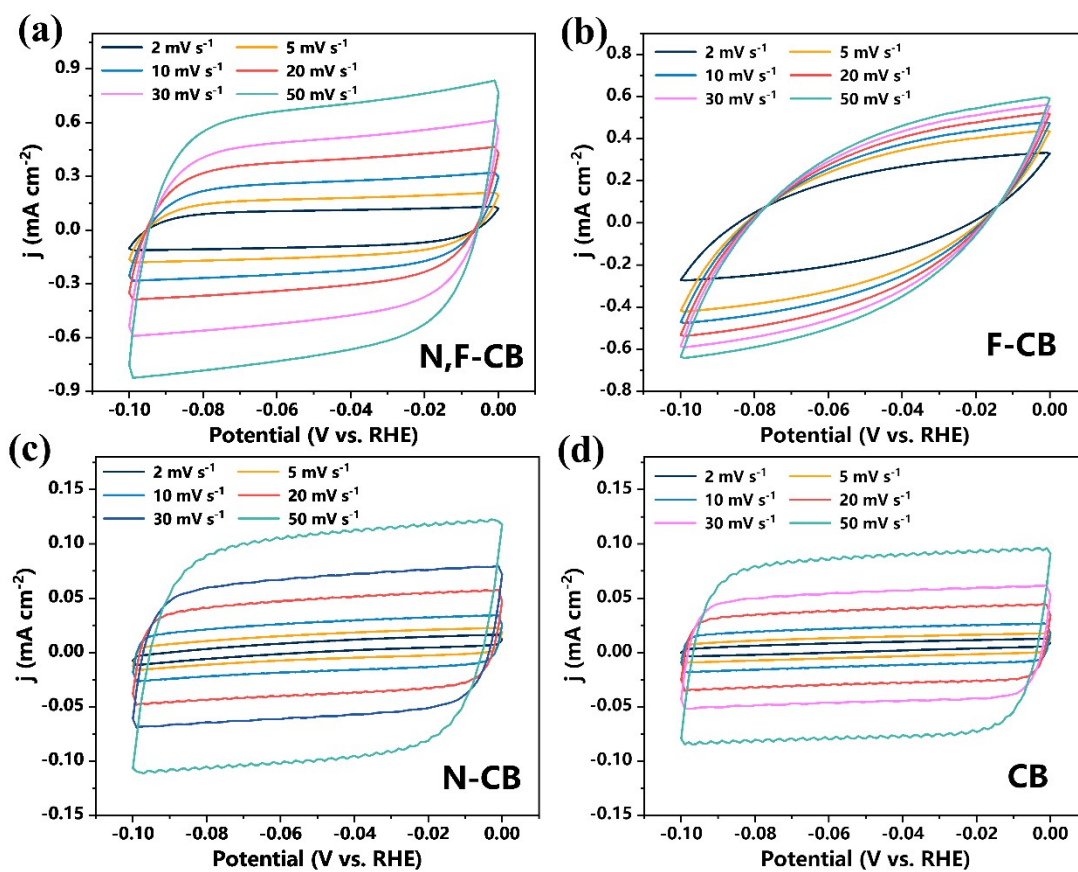

**Fig. S8.** The CV curves of (a) N,F-CB, (b) F-CB, (c) N-CB, and (d) CB measured in 0.1 M  $\text{KHCO}_3$  solutions saturated with  $\text{CO}_2$  at different scan rate from 2 to 50  $\text{mV s}^{-1}$  in the potential ranges of 0 V  $\sim$  -0.10 V vs. RHE.

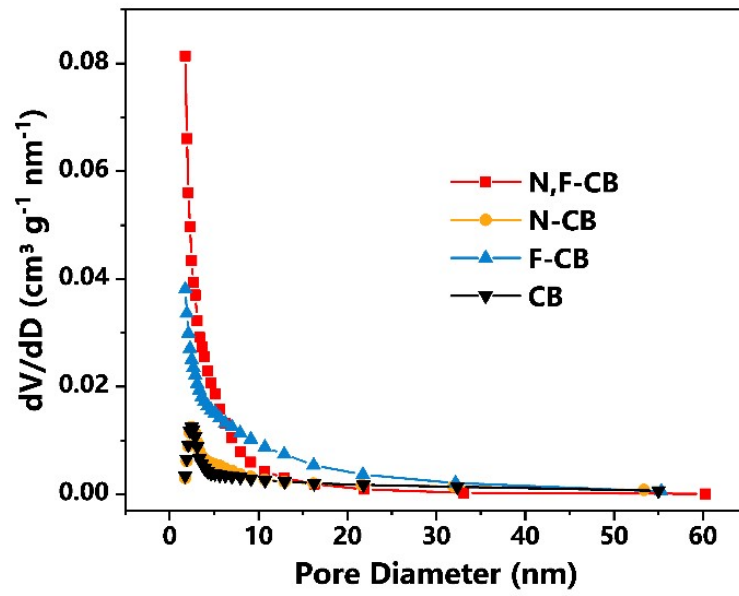

**Fig. S9.** The pore size distribution curves of N,F-CB, N-CB, F-CB, and CB.

**Table S1.** The N contents of catalysts summary from XPS analysis.

|                         | <b>N-CB</b> | <b>N,F-CB</b> |
|-------------------------|-------------|---------------|
| <b>N (at. %) of XPS</b> | 0.52        | 3.27          |
| Pyridinic N             | 34.37%      | 32.52%        |
| Graphitic N             | 38.57%      | 39.34%        |
| Pyrrolic N              | 21.69%      | 15.60%        |
| Oxidized N              | 5.37%       | 12.54%        |

**Table S2.** Summary of the reported nitrogen doped carbon electrocatalysts in CO<sub>2</sub>RR.

| Electrocatalyst                         | Electrolyte (KHCO <sub>3</sub> ) | Potentials (V vs. RHE) | FE <sub>CO</sub> (%) | j <sub>CO</sub> (mA cm <sup>-2</sup> ) | Ref.      |
|-----------------------------------------|----------------------------------|------------------------|----------------------|----------------------------------------|-----------|
| N,F-CB                                  | 0.1 M                            | -0.7                   | 93                   | 4.6                                    | This work |
| Au-N-C                                  | 0.1 M                            | -0.5                   | 80                   | 6                                      | S1        |
| NC(NH <sub>3</sub> )                    | 0.1 M                            | -0.5                   | 83                   | ~                                      | S2        |
| NS-CNSs-1000                            | 0.5 M                            | -0.55                  | 85.4                 | 2.5                                    | S3        |
| MNC-D                                   | 0.1 M                            | -0.58                  | 92                   | 6.8                                    | S4        |
| A-350-1000                              | 0.1 M                            | -0.68                  | 89                   | 0.8                                    | S5        |
| NRMC-1000                               | 0.1 M                            | -0.7                   | 80                   | 2.9                                    | S6        |
| NCNT-NH <sub>3</sub>                    | 0.5 M NaHCO <sub>3</sub>         | -0.8                   | 96.5                 | ~13                                    | S7        |
| NCNTs                                   | 0.1 M                            | -0.8                   | 80                   | -0.8                                   | S8        |
| N-graphenes                             | 0.5 M                            | -0.84                  | 73 (Formate)         | 7.0                                    | S9        |
| NCNT-3-700                              | 0.5 M NaHCO <sub>3</sub>         | -0.9                   | 90                   | 5.0                                    | S10       |
| NC-900                                  | 0.1 M                            | -0.93                  | 78                   | 0.8                                    | S11       |
| NCNTs-ACN-850                           | 0.1 M                            | -1.05                  | 80                   | ~                                      | S12       |
| g-C <sub>3</sub> N <sub>4</sub> /MWCNTs | 0.1 M                            | -0.75                  | 60                   | 0.55                                   | S13       |
| BAX-M-950                               | 0.1 M                            | -0.66                  | 40                   | 1.5                                    | S14       |

**Table S3.** The double layer capacitance of different catalysts and the corresponding normalized roughness factor.

| <b>Catalysts</b> | <b><math>C_{dl}</math> (mF cm<sup>-2</sup>)</b> | <b><math>R_f</math></b> |
|------------------|-------------------------------------------------|-------------------------|
| CB               | 1.68                                            | 1                       |
| N-CB             | 2.05                                            | 1.22                    |
| F-CB             | 5.22                                            | 3.11                    |
| N,F-CB           | 11.56                                           | 6.88                    |

## References

- S1 A. S. Varela, N. R. Sahraie, J. Steinberg, W. Ju, H. S. Oh and P. Strasser, *Angew. Chem. Int. Ed.*, 2015, **54**, 10758-10762.
- S2 W. O. Silva, G. C. Silva, R. F. Webster, T. M. Benedetti, R. D. Tilley and E. A. Ticianelli, *ChemElectroChem*, 2019, **6**, 4626-4636.
- S3 G. Wang, M. Liu, J. Jia, H. Xu, B. Zhao, K. Lai, C. Tu and Z. Wen, *ChemCatChem*, 2020, **12**, 2203-2208.
- S4 M. Kuang, A. Guan, Z. Gu, P. Han, L. Qian and G. Zheng, *Nano Research*, 2019, **12**, 2324-2329.
- S5 M. Chen, S. Wang, H. Zhang, P. Zhang, Z. Tian, M. Lu, X. Xie, L. Huang and W. Huang, *Nano Research*, 2020, **13**, 729-735.
- S6 R. Daiyan, X. Tan, R. Chen, W. H. Saputera, H. A. Tahini, E. Lovell, Y. H. Ng, S. C. Smith, L. Dai, X. Lu and R. Amal, *ACS Energy Lett.*, 2018, **3**, 2292-2298.
- S7 C. Ma, P. Hou, X. Wang, Z. Wang, W. Li and P. Kang, *Appl. Catal. B-Environ.*, 2019, **250**, 347-354.
- S8 J. Wu, R. M. Yadav, M. Liu, P. P. Sharma, C. S. Tiwary, L. Ma, X. Zou, X. Zhou, B. I. Yakobson, J. Lou and P. M. Ajayan, *ACS Nano*, 2015, **9**, 5364-5371.
- S9 H. Wang, Y. Chen, X. Hou, C. Ma and T. Tan, *Green Chem.*, 2016, **18**, 3250.
- S10 J. Xu, Y. Kan, R. Huang, B. Zhang, B. Wang, K. H. Wu, Y. Lin, X. Sun, Q. Li, G. Centi and D. Su, *ChemSusChem*, 2016, **9**, 1085-1089.
- S11 R. Wang, X. Sun, S. Ould-Chikh, D. Osadchii, F. Bai, F. Kapteijn and J. Gascon, *ACS Appl. Mater. Interfaces*, 2018, **10**, 14751-14758.

S12 P. P. Sharma, J. Wu, R. M. Yadav, M. Liu, C. J. Wright, C. S. Tiwary, B. I. Yakobson, J. Lou, P. M. Ajayan and X. Zhou, *Angew. Chem. Int. Ed.*, 2015, **54**, 13701-13705.

S13 X. Lu, T. H. Tan, Y. H. Ng and R. Amal, *Chem. Eur. J.*, 2016, **22**, 11991-11996.

S14 W. Li, B. Herkt, M. Seredych and T. J. Bandosz, *Appl. Catal. B-Environ.*, 2017, **207**, 195-206.
